# Supplementary material for: Autophagy in the corpus luteum correlates with tissue growth in pregnant rats
Source: PubMed Central journal article supplement — J Reprod Dev. 2024 Jul 7;70(5):286–95. doi: 10.1262/jrd.2024-019 (PMC11461521; doi:10.1262/jrd.2024-019), 2024-07-07
Supplement: jrd-70-286-s001.pdf [file jrd-70-286-s001.pdf]

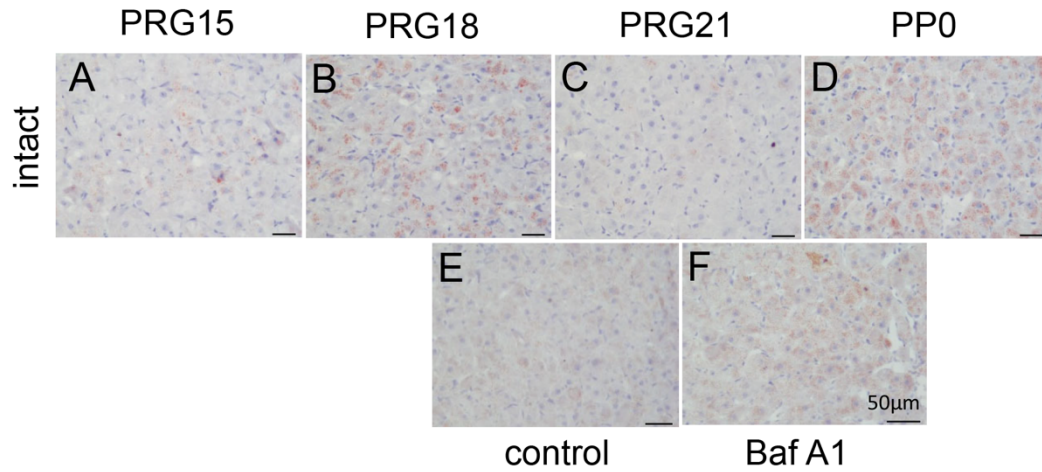

**Supplementary Fig. 1.** Sudan staining of CL tissue

Lipid droplets in the rat CL tissues at PRG15 (A), 18 (B), 21 (C), and PP0 (D) were detected by Sudan III staining (orange). Tissues treated with vehicle (E) or Baf A1 (125 pg/rat) and sampled at PRG21 were also stained. Lipid droplet staining intensity was marked on PRG18, weakened on PRG21, rebounded on PP0, and was attenuated by Baf A1 treatment (F) when compared to control (E) and intact (C) tissues. Scale bar, 50 μm.
